# Supplementary material for: miR-126 Decreases Proliferation and Mammosphere Formation of MCF-7 and Predicts Prognosis of ER+ Breast Cancer
Source: MDPI journal article supplement (doi:10.3390/diagnostics12030745), 2022-03-18
Supplement: s1 [file s1]

Supplementary Data

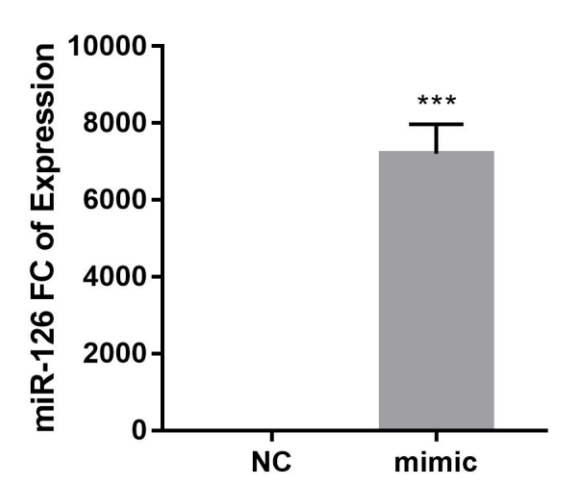

**Figure S1. Transfection Efficiency of miR-126 mimic in MCF-7.** RT-qPCR analysis of miR-126 levels as compared to NC in MCF-7 24hrs post-transfection with RNU6B as an endogenous control. Error bars represent SEM (n=3). \*\*\* denotes  $p<0.001$ .

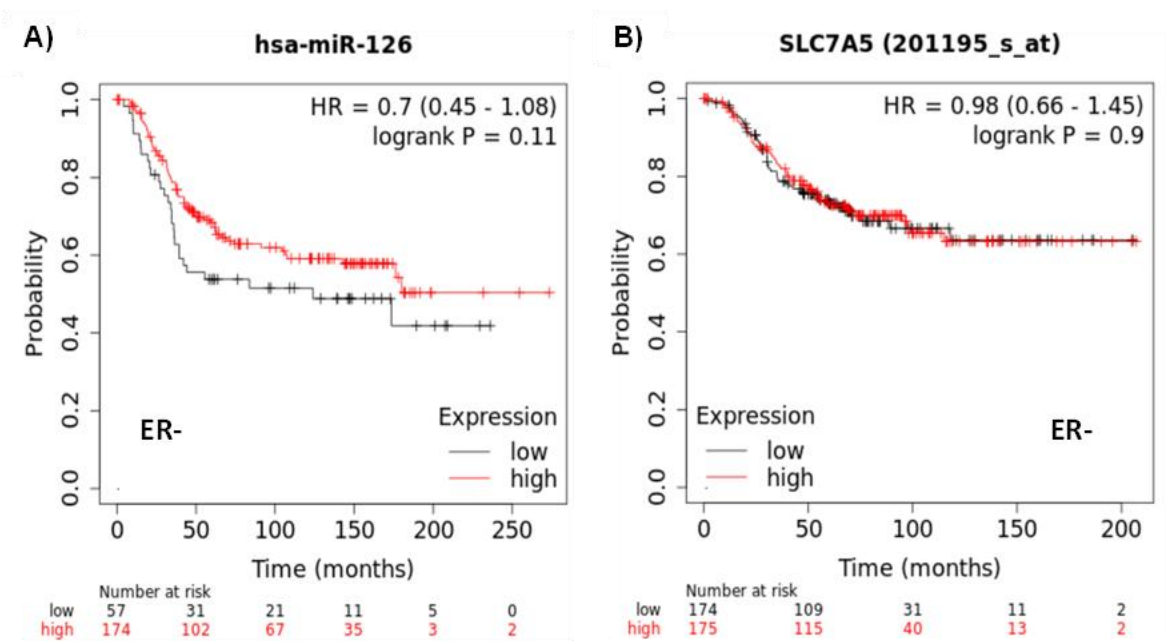

**Figure S2. Correlation of the Expression of miR-126 or SLC7A5 with Overall Survival (OS) of ER- BC Patients.** *In Silico* Kaplan-Meier Plot of (A): hsa-miR-126 expression with OS of 231 ER- BC patients, (B): SLC7A5 expression with OS of 349 ER- BC patients. HR: Hazard Ratio.

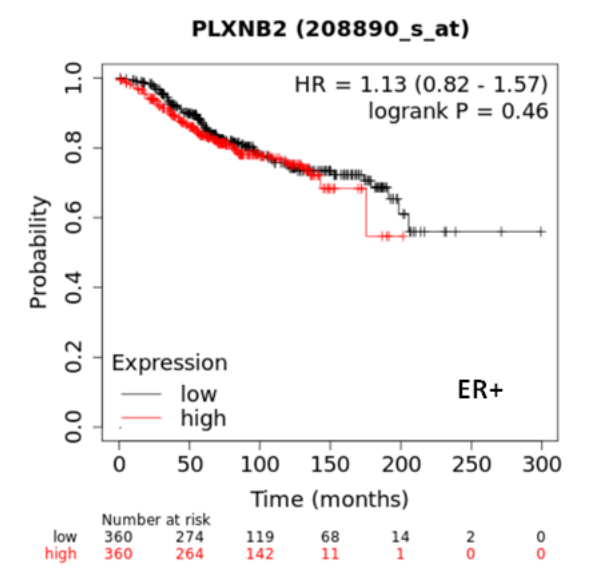

**Figure S3. Correlation of the Expression of PLXNB2 with Overall Survival (OS) of ER+ BC Patients.** *In Silico* Kaplan-Meier Plot of PLXNB2 expression with OS of 720 ER+ BC patients HR: Hazard Ratio.
